# Supplementary material
Source: PubMed Central journal article supplement (PMC3067165)

RP120902\_1d64.291110

RP120902 i C6D6

nt=64

291110

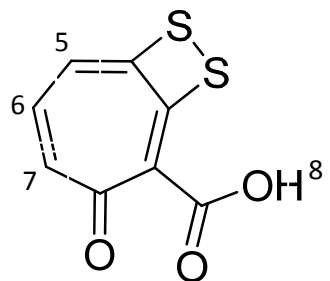

Supplementary Figure 1:  $^1\text{H}$  NMR spectrum (Bruker 500 MHz) of tropodithietic acid purified from *Phaeobacter gallaeciensis* DSM 17395 and dissolved in  $^2\text{H}_6$ -benzene

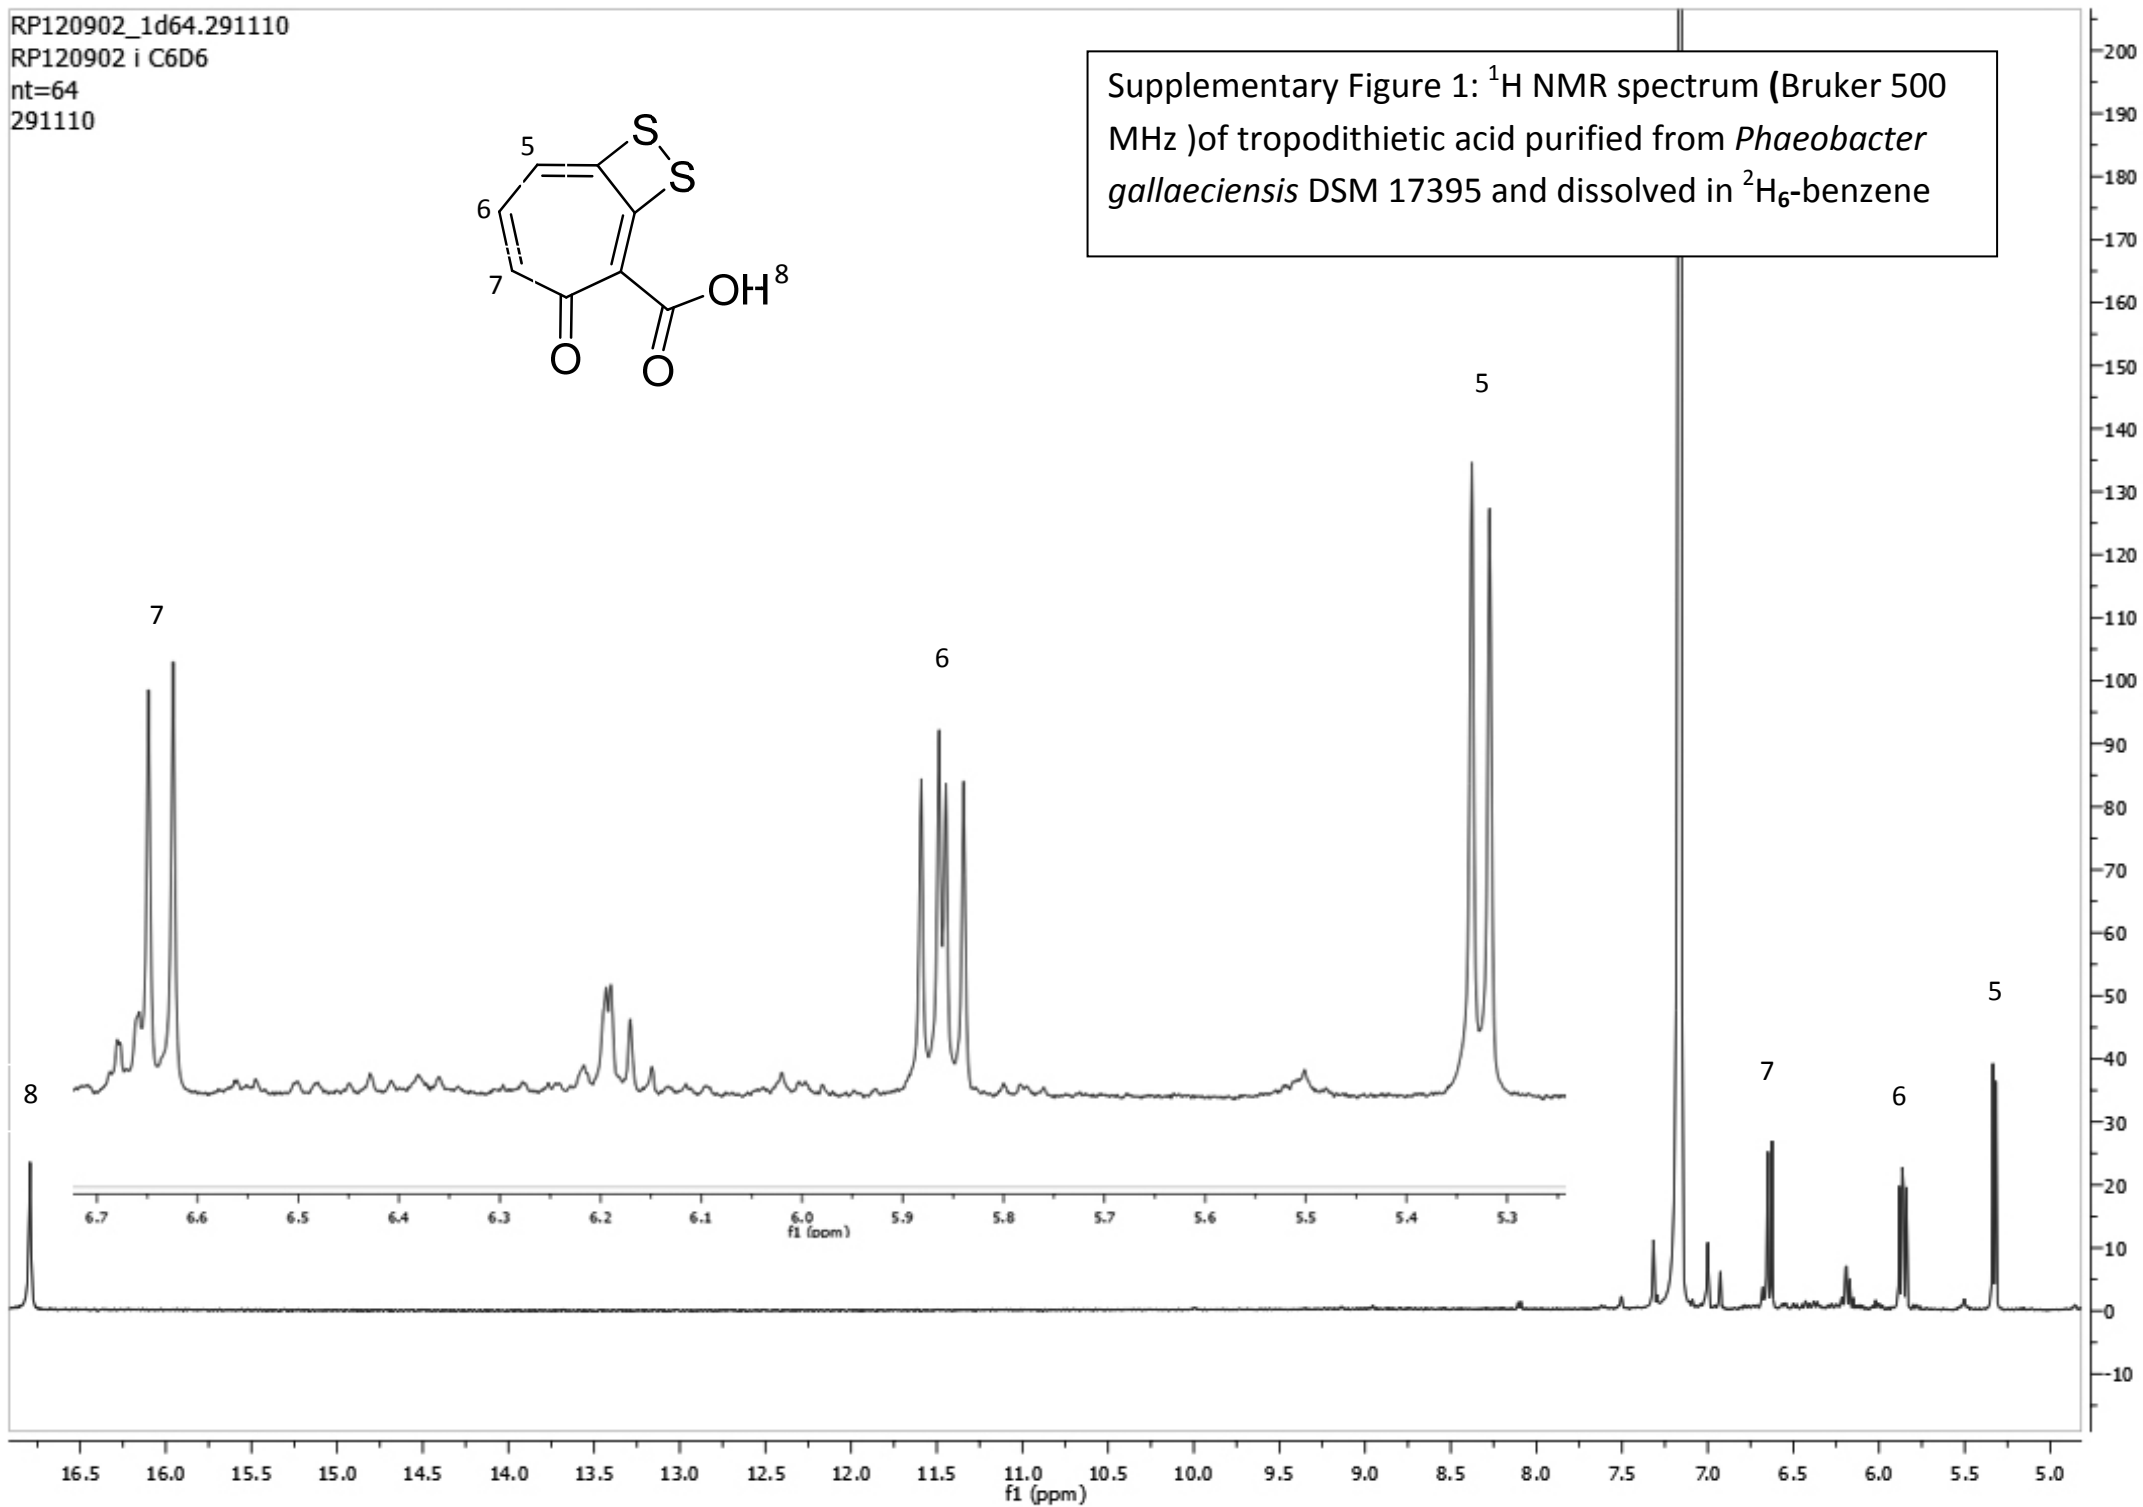

Supplement: AAC.01222-10_1.pdf [file AAC.01222-10_1.pdf]
